# Supplementary material
Source: PubMed Central journal article supplement (PMC2878523)
Supplement: supp_M110.117416_jbc.M110.117416-1.pdf [file supp_M110.117416_jbc.M110.117416-1.pdf]

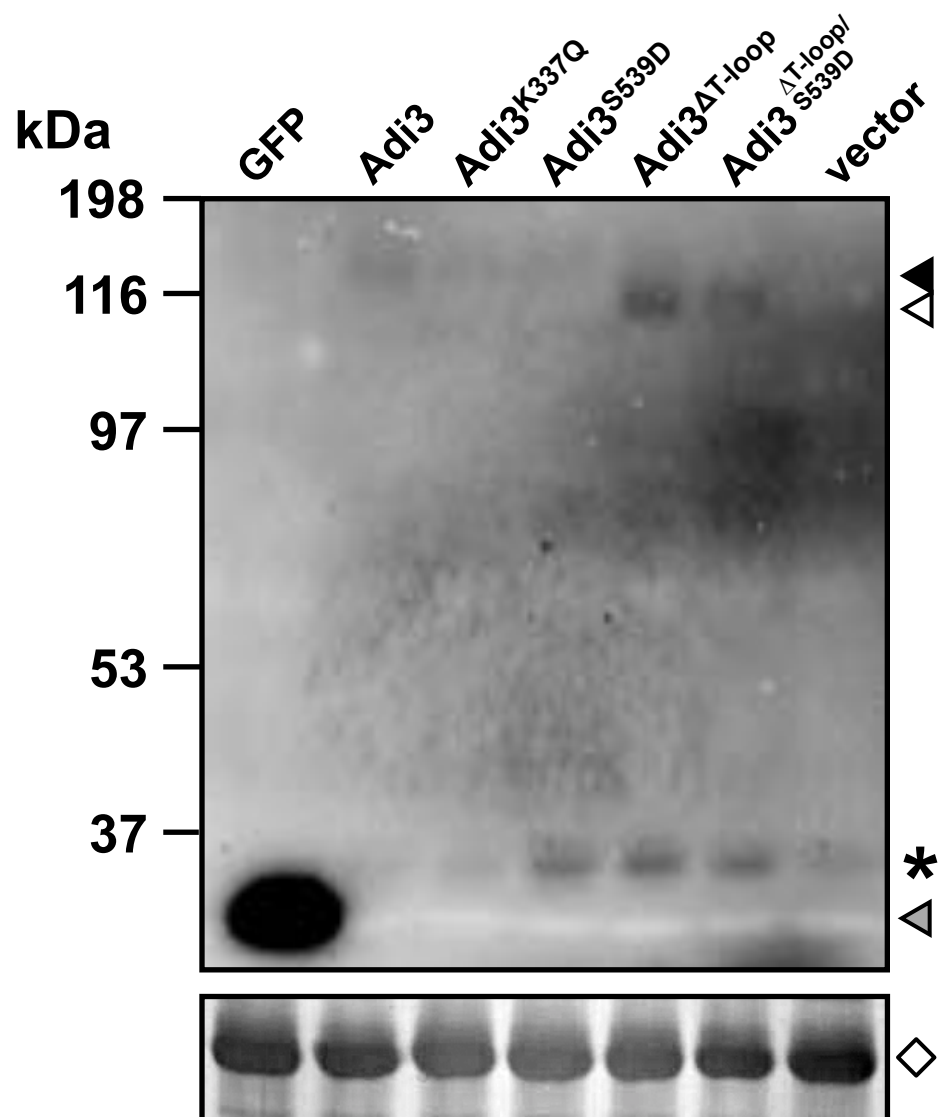

Supplemental Figure S1. **Detection of nonspecific protein band in  $\alpha$ -GFP western blot.** The indicated proteins were expressed in PtoR tomato protoplasts for 16 hrs, total protein extracted, and 40  $\mu$ g of total protein analyzed by  $\alpha$ -GFP western blot. A nonspecific protein band indicated by the asterisk can be detected in every sample including GFP alone and the empty vector. Filled triangle = GFP-Adi3 proteins; open triangle = GFP-Adi3<sup>ΔT-loop</sup> proteins; gray triangle = GFP; asterisk = nonspecific protein; open diamond = RuBisCo loading control.

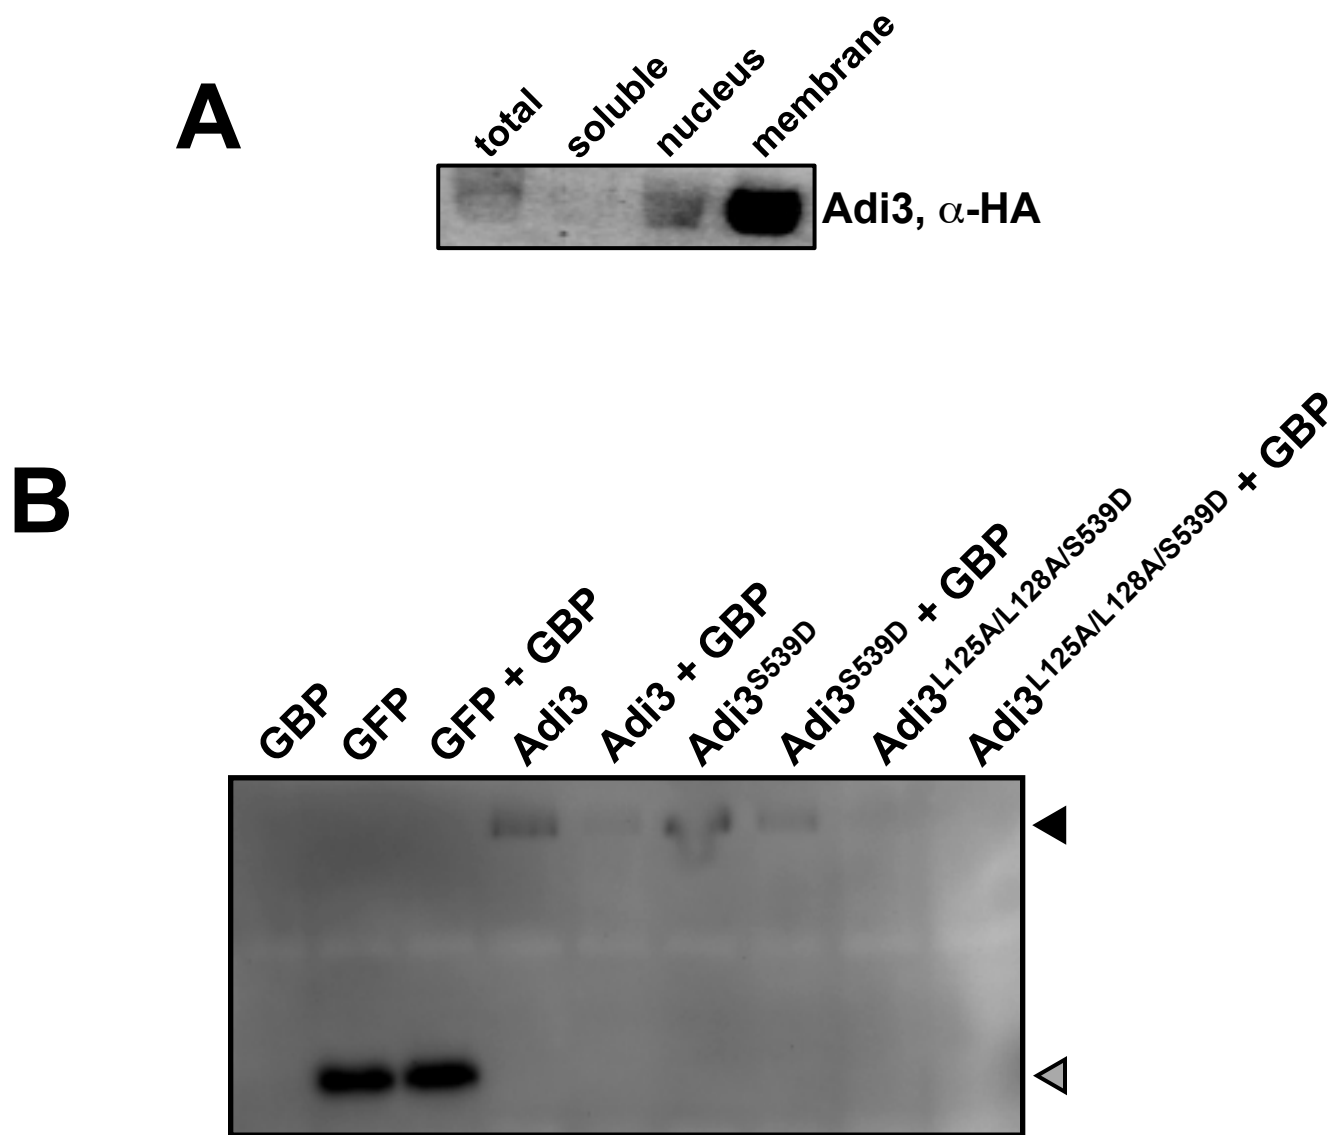

Supplemental Figure S2. **HA-Adi3 subcellular localization and reduction of GFP-Adi3 nuclear localization when expressed with GBP.** *A*, Western blot of cellular fractionation of HA-Adi3 expression in tomato protoplasts. Western blots were carried out with the  $\alpha$ -HA antibody and are representative of three independent experiments. *B*, Reduction of nuclear GFP-Adi3 by GBP. The indicated proteins were expressed in tomato protoplasts for 16 hrs, nuclei isolated from each sample, and an  $\alpha$ -GFP western blot carried out. The GBP protein is not capable of reducing GFP nuclear localization but does show a strong reduction of nuclear localized GFP-Adi3. The GBP protein does not have a GFP tag and thus is not detected in the western blot. Filled triangle = GFP-Adi3; gray triangle = GFP.

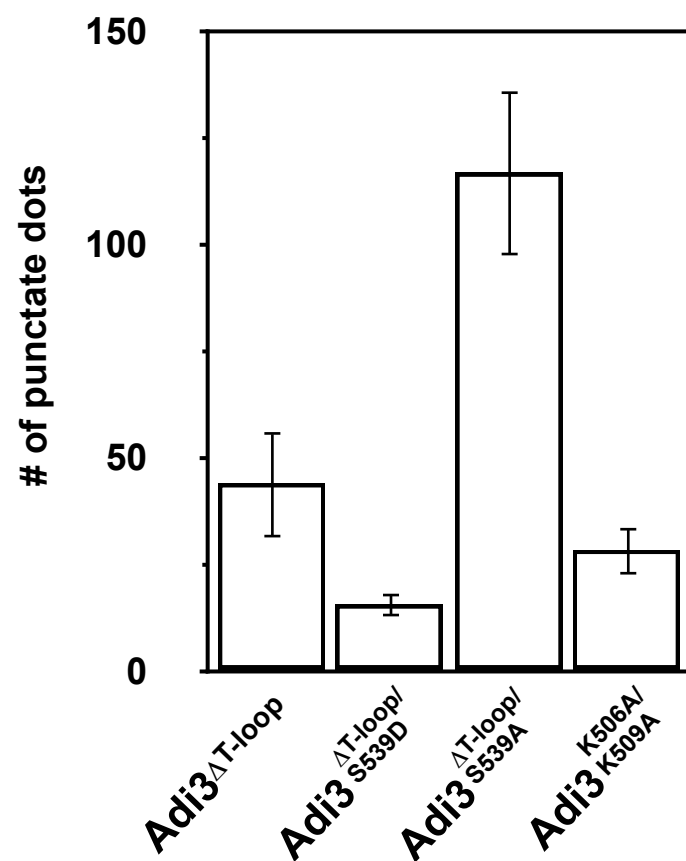

Supplemental Figure S3. **The number of punctate structures from deletion of the Adi3 T-loop extension.** The indicated *GFP-Adi3* constructs were expressed in tomato protoplasts for 16 hrs., viewed by confocal microscopy, and the number of GFP positive punctate structures counted in a minimum of three cells for each construct. The data from five independent experiments were averaged and shown with standard error.

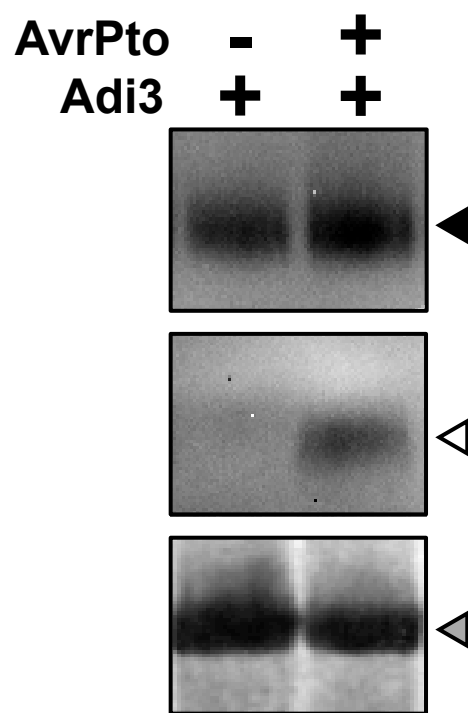

Supplemental Figure S4. **Western blot detection of AvrPto expression after transformation of protoplasts transiently expressing Adi3.** PtoR protoplasts transiently expressing GFP-Adi3 for 14 hrs were transformed with a *BFP-avrPto* construct, proteins expressed for an additional 3 hrs, and the presence of Adi3 and AvrPto proteins analyzed by  $\alpha$ -GFP western blot. Filled triangle = GFP-Adi3; open triangle = BFP-AvrPto, gray triangle = RuBisCo loading control.

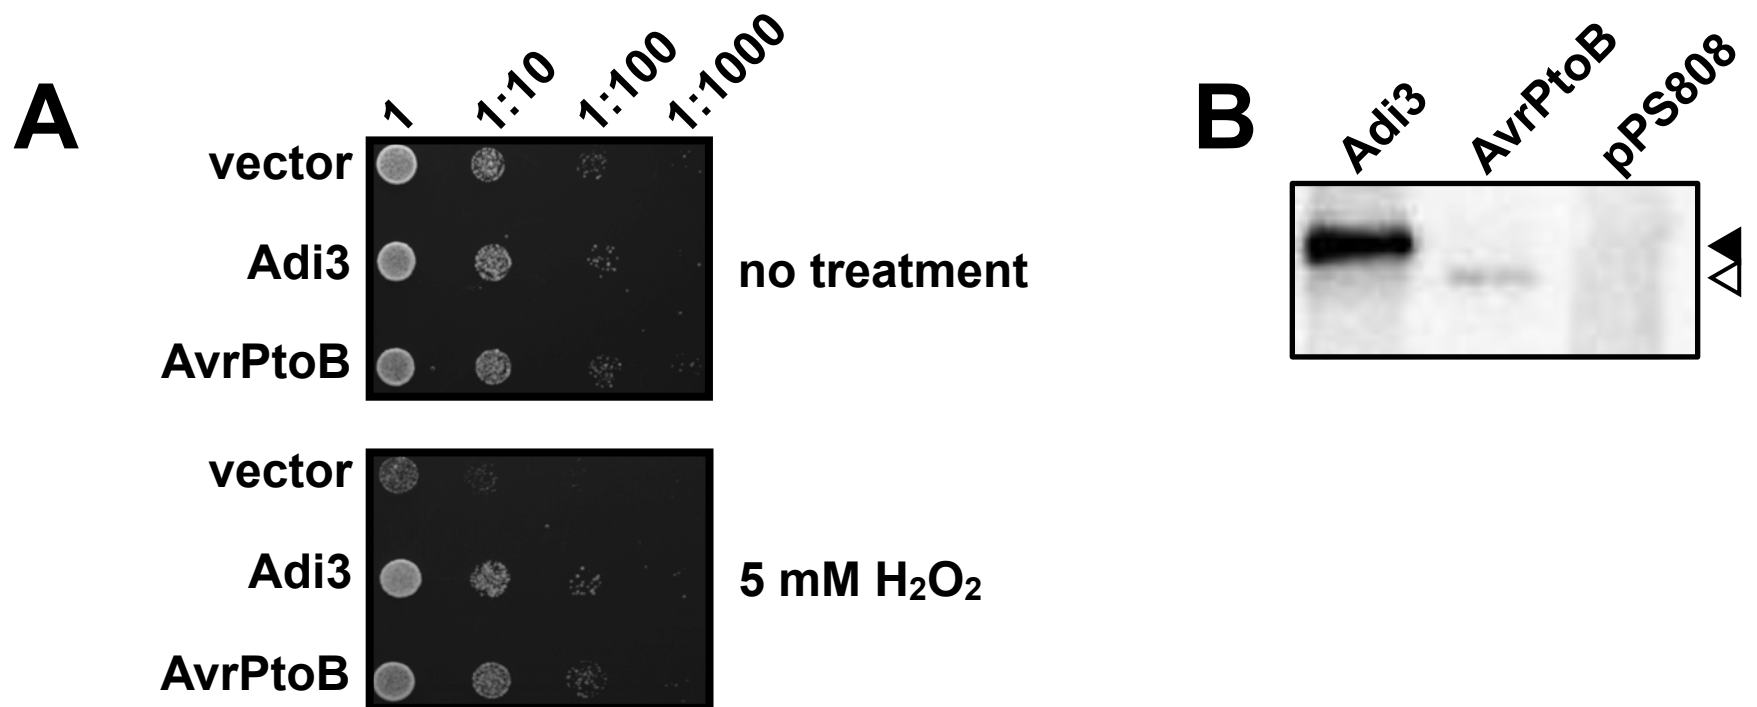

Supplemental Figure S5. **Overexpression of Adi3 can suppress H<sub>2</sub>O<sub>2</sub> cell death induction in yeast.** *A*, *GFP-Adi3* was expressed from the galactose inducible yeast expression vector pPS808 overnight at 30°C in the presence of glucose, switched to galactose media for 6 hrs, switched back to glucose media in the presence of 0 or 5 mM H<sub>2</sub>O<sub>2</sub> for 2 hrs, and plated on YPD plates in serial dilutions. Galactose induced expression of the *Pst* effector protein GFP-AvrPtoB was used as a positive CDS control (48). *B*, Western blot detection ( $\alpha$ -GFP) of Adi3 and AvrPtoB galactose induced yeast expression. Filled triangle, GFP-Adi3; open triangle, GFP-AvrPtoB.
